# Supplementary material
Source: publisher figshare collection journal article supplement (https://gsajournals.figshare.com/ndownloader/files/17930525)
Supplement: Supplementary file 1 [file 17930525]

| **Table S4** Analyses of variance on locomotor reactivity and food consumption. | | | | | | |
| --- | --- | --- | --- | --- | --- | --- |
| **Trait** | **Odorant** | **Term** | **df** | **S.S.** | ***F*** | ***P*** |
| Locomotor reactivity | BUT | Selection | 2 | 81.1111 | 1.4067 | 0.2478 |
|  |  | Line (Selection) | 6 | 283.90 | 1.6413 | 0.1385 |
|  | CYC | Selection | 2 | 314.03 | 2.0782 | 0.0888 |
|  |  | Line (Selection) | 6 | 269.10 | 2.1075 | 0.0542 |
| Food Consumption | BUT | Selection | 2 | 4.0460 | 9.5706 | **0.0001** |
|  |  | Line (Selection) | 6 | 0.34 | 0.0264 | 0.9530 |
|  | CYC | Selection | 2 | 1.51 | 2.9427 | 0.0549 |
|  |  | Line (Selection) | 6 | 5.11 | 3.3178 | **0.0039** |
| Degrees of freedom (df), Sum of Squares (S.S.), *F* ratio (*F*), and *P*-value (*P*). | | | | | | |
| Significant terms in bold. | | | | | | |
